# Supplementary material for: Effects of Bone Marrow Sparing and TGF-β3 Treatment in Total Body Irradiation of C57BL/6J Mice
Source: MDPI journal article supplement (doi:10.3390/applbiosci3020011), 2024-04-04
Supplement: s1 [file s1]

## *In Vitro* $\alpha$ -SMA Flow Cytometry Assay

### Samples

- 2 × T25 flasks with MRC-5 cells for each sample. Seeded day 0.

### Treatments

- TGF- $\beta$ 3 treatment: TGF- $\beta$ 3 solution added to cell medium at concentrations of 0.01 ng/mL, 0.5 ng/mL or 50 ng/mL on day 1 (24 hours after seeding)
- Controls: Sham irradiated on day 2.
- Irradiated: Irradiated on day 2 (48 hours after seeding)

Harvesting, staining and flow cytometry was performed 96 hours after seeding.

### Protocol

1. Aspirate medium and wash with 2 mL PBS
2. Add 0.5 mL trypsin and incubate 1–2 min (37°C)
3. Tap cells gently against counter to ensure detachment, add 3 mL cell medium, and use a 2 mL pipette to resuspend to single cells
4. Transfer **two cell flasks to one centrifuge tube**, to ensure sufficient number of cells for analysis
5. Centrifuge at 200 G for 5 min, and remove supernatant
6. Resuspend in 8 mL PBS and split each sample in two: **sample** and **secondary ab control**
7. Add 2 mL PBS to all tubes, centrifuge at 200 G for 5 min, and remove supernatant
8.
  - a. To **samples**: Resuspend in 150  $\mu$ L primary ab solution
  - b. To **secondary ab controls**: Resuspend in 150  $\mu$ L PBS with 1% BSA
9. Incubate 30 min (on ice)
10. Wash twice in 5 mL **ice cold** PBS (centrifuge 200 G, 5 min, 4°C) and remove supernatant
11. Resuspend all samples in 150  $\mu$ L secondary ab solution and incubate 30 min in the dark (on ice)
12. Wash twice with 5 mL **ice cold** PBS (centrifuge 200 G, 5 min, 4°C) and remove supernatant.
13. Resuspend in 150  $\mu$ L PBS
14. Keep samples on ice in the dark until flow cytometry analysis
15. Immediately before analysis, add 0.5  $\mu$ L PI solution for live/dead staining
16. Filter and run flow

### Solutions

- **TGF- $\beta$ 3 solution**
  - 50  $\mu$ g/mL in 4 mM HCl
- **PBS**
- **Trypsin (37°C)**
- **PBS with 1% BSA**
- **Primary ab solution**
  - Anti- $\alpha$ -SMA primary antibody diluted 1:600 in PBS with 1% BSA
- **Secondary ab solution**
  - Alexa Fluor 647 goat anti-rabbit IgG diluted 1:400 in PBS with 1% BSA

- **PI solution**
  - 1.0 mg/mL in PBS

## Data Analysis

$\alpha$ -SMA expression intensity  $\bar{I}$  is calculated using the following formula:

$$\bar{I} = \frac{(S - S_2) - (C - C_2)}{\bar{C}_2};$$

where  $S$  is the median  $\alpha$ -SMA fluorescence intensity of a given sample,  $S_2$  the median intensity of its secondary control,  $C$  the median intensity of the control sample,  $C_2$  the median intensity of the secondary control to the control sample, and  $\bar{C}_2$  is the mean of the median intensities of secondary controls to the control samples in the experiment.
